# Supplementary material for: Frog eat frog: exploring variables influencing anurophagy
Source: PubMed Central journal article supplement (PMC4556157; doi:10.7717/peerj.1204), 2015-08-25
Supplement: peerj-03-1204-s001.pdf [file peerj-03-1204-s001.pdf]

|                                                                                                                                                                                                                                                                                                           |                                                        |         |         |             |              |              |            |                |                 |                            |                    |            |       |    |     |          |   |
|-----------------------------------------------------------------------------------------------------------------------------------------------------------------------------------------------------------------------------------------------------------------------------------------------------------|--------------------------------------------------------|---------|---------|-------------|--------------|--------------|------------|----------------|-----------------|----------------------------|--------------------|------------|-------|----|-----|----------|---|
| Smith, G. R., J. A. Lemos-Clarke, R. D.                                                                                                                                                                                                                                                                   | 2011 Diets of three species of Western North America   | 71      | 4       | 563-569     | Mexico       | 27.0291      | -103.10667 | no             | Hyla            | Bufonidae                  | Anaxyrus debilis   | generalist | 32    | 46 | no  | 7        | 0 |
| Bush F. M. and E. F. Men                                                                                                                                                                                                                                                                                  | 1974 Food habits of toads, genus Bufo (Amphibia: Bufo) | 91      | 1       | 140-147     | USA          | 41.375253    | -72.988937 | no             | Hyla            | Bufonidae                  | Anaxyrus fowleri   | generalist | 108   | 60 | no  | 11       | 0 |
| Smith, G. R., J. A. Lemos-Smith, C. C., & A. N. Brag Dan Coga' Inceanu1, Mi Mollov, I. A. and A. M. St Széplaki, E., I. aszalós, N. Feren?i, S., L., Citrea, H. Groza M. I.,?l. C. Suciuc, A Cicort-Lucaciu, A. S., D. C Bogdan, H. V., S. D. Cova Ghiurc?, D., & L., Zaharia Ghiurc?, D., L., Zaharia, I | 2011 Diets of three species of Western North America   | 71      | 4       | 563-569     | Mexico       | 28.36778     | -108.9257  | no             | Hyla            | Bufonidae                  | Anaxyrus punctatus | generalist | 23    | 60 | no  | 7        | 0 |
| 2011 Diets of three species of Western North America                                                                                                                                                                                                                                                      | 30                                                     | 3       | 333-350 | USA         | 35.164006    | -97.207129   | no         | Hyla           | Bufonidae       | Anaxyrus woodhousii        | generalist         | 517        | 90    | no | 15  | 0        |   |
| 2010 Feeding in anuran corr Amphibia-Reptilia                                                                                                                                                                                                                                                             | 22                                                     |         |         | Romania     | 45.166667    | 27.933333    | no         | Discoglossidae | Bombinatoridae  | Bombina bombina            | generalist         | 142        | 41    | no | 9   | 0        |   |
| 2010 Diety?yand?trophic?ynic Biotechnology & Biotech                                                                                                                                                                                                                                                      | 24                                                     | 2       | 263-269 | Poland      | 54.456528    | 18.208961    | no         | Hyla           | Bufonidae       | Bombina bombina            | generalist         | 37         | 41    | no | 11  | 0        |   |
| 2006 Feeding niche charactr Analene Universit??ii din                                                                                                                                                                                                                                                     | 13                                                     | 14-17   |         | Romania     | 47.886985    | 23.14009     | no         | Discoglossidae | Bombinatoridae  | Bombina bombina            | generalist         | 87         | 41    | no | 8   | 0        |   |
| 2007 Analiza comparativ? a Biharean Biologist                                                                                                                                                                                                                                                             | 1                                                      | 15-22   |         | Romania     | 47.942113    | 23.211312    | no         | Discoglossidae | Bombinatoridae  | Bombina bombina            | generalist         | 102        | 41    | no | 8   | 0        |   |
| 2008 Comparison between Biharean Biologist                                                                                                                                                                                                                                                                | 2                                                      | 50-57   |         | Romania     | 46.905018    | 22.490832    | no         | Discoglossidae | Bombinatoridae  | Bombina variegata          | generalist         | 178        | 42    | no | 8   | 0        |   |
| 2011 Feeding of two amphill North-Western Journal                                                                                                                                                                                                                                                         | 7                                                      | 2       | 297-303 | Romania     | 46.939333    | 22.522273    | no         | Discoglossidae | Bombinatoridae  | Bombina variegata          | generalist         | 85         | 44.71 | no | 8   | 0        |   |
| 2013 How do we share food Animal Biodiversity and                                                                                                                                                                                                                                                         | 36                                                     | 86-99   |         | Romania     | 45.45729     | 22.445       | no         | Discoglossidae | Bombinatoridae  | Bombina variegata          | generalist         | 82         | 44.71 | no | 6   | 0        |   |
| 2005 Data regarding the tro North Western Journal                                                                                                                                                                                                                                                         | 1                                                      | 15-24   |         | Romania     | 46.587274    | 26.75036     | no         | Hyla           | Bombinatoridae  | Bombina variegata          | generalist         | 57         | 44.7  | no | 9   | 0        |   |
| 2005 Data regarding the tro Insecta-total                                                                                                                                                                                                                                                                 | 113                                                    | 90      |         | Romania     | 46.956567    | 26.333023    | no         | Discoglossidae | Bombinatoridae  | Bombina variegata          | generalist         | 27         | 44.7  | no | 9   | 0        |   |
| 2006 Data regarding the tro Complexul Muzeal de ?t                                                                                                                                                                                                                                                        | 21                                                     | 4       | 31-36   | Romania     | 46.149428    | 26.447416    | no         | Discoglossidae | Bombinatoridae  | Bombina variegata          | generalist         | 70         | 44.7  | no | 5   | 0        |   |
| 2007 Population density an Journal of Biological Res                                                                                                                                                                                                                                                      | 8                                                      | 129-137 |         | Greece      | 39.919505    | 21.260086    | no         | Discoglossidae | Bombinatoridae  | Bombina variegata          | generalist         | 37         | 44.7  | no | 8   | 0        |   |
| 2007 Population density an Journal of Biological Res                                                                                                                                                                                                                                                      | 8                                                      | 129-137 |         | Greece      | 39.941188    | 21.042795    | no         | Discoglossidae | Bombinatoridae  | Bombina variegata          | generalist         | 29         | 41.7  | no | 8   | 0        |   |
| 2002 The trophic spectrum Herpetologica Romanica                                                                                                                                                                                                                                                          | 3                                                      | 57-61   |         | Romania     | 44.984422    | 26.430505    | no         | Discoglossidae | Bombinatoridae  | Bombina variegata          | generalist         | 39         | 44.7  | no | 8   | 0        |   |
| 2012 Diet Composition and Journal of Herpetology                                                                                                                                                                                                                                                          | 46                                                     | 4       | 562-567 | Serbia      | 44.689444    | 20.516777    | no         | Hyla           | Bufonidae       | Bufo bufo                  | generalist         | 142        | 77.17 | no | 8   | 0        |   |
| 2012 Diet Composition and Journal of Herpetology                                                                                                                                                                                                                                                          | 46                                                     | 4       | 562-567 | Serbia      | 44.69031     | 20.51727     | no         | Hyla           | Bufonidae       | Bufo bufo                  | generalist         | 142        | 110   | no | 19  | 0        |   |
| 2010 Diet and trophic niche Biotechnology & Biotech                                                                                                                                                                                                                                                       | 24                                                     | 2       | 263-269 | Poland      | 54.456528    | 18.208961    | no         | Hyla           | Bufonidae       | Bufo bufo                  | generalist         | 20         | 107   | no | 11  | 0        |   |
| 1987 The diet of the commc Amphibia-Reptilia                                                                                                                                                                                                                                                              | 8                                                      | 13-17   |         | UK          | 52.179552    | -3.5482      | no         | Hyla           | Bufonidae       | Bufo bufo                  | generalist         | 161        | 107   | no | 2   | 0        |   |
| 2007 A comparison of stom: Acta Zoologica Sinica                                                                                                                                                                                                                                                          | 53                                                     | 2       | 364-372 | China       | 29.843852    | 122.032164   | no         | Hyla           | Bufonidae       | Bufo gargarizans           | generalist         | 43         | 78.26 | no | 13  | 0        |   |
| 2012 Trophic ecology and Zoologia (Curitiba)                                                                                                                                                                                                                                                              | 29                                                     | 1       | 54-58   | China       | 30.583333    | 105.75       | no         | Hyla           | Bufonidae       | Bufo gargarizans           | generalist         | 49         | 97.3  | no | 10  | 0        |   |
| 2009 Seasonal variation and Biharean Biologist                                                                                                                                                                                                                                                            | 3                                                      | 2       | 99-104  | China       | 30.583333    | 105.75       | no         | Hyla           | Bufonidae       | Bufo gargarizans           | generalist         | 109        | 80    | no | 10  | 0        |   |
| 2002 Feeding ecology of Bufo japonicus formosus fr                                                                                                                                                                                                                                                        | 36                                                     | 4       | 719-723 | Japan       | 35.117028    | 135.758472   | no         | Hyla           | Bufonidae       | Bufo japonicus             | generalist         | 55         | 148.5 | no | 13  | 0        |   |
| 2012 Terrestrial isopods in the diet of two amphibian                                                                                                                                                                                                                                                     | 17                                                     |         |         | Romania     | 44.759735    | 28.724258    | no         | Hyla           | Bufonidae       | Bufo viridis               | generalist         | 21         | 85    | no | 9   | 0        |   |
| 2010 Human influence or n: Acta Zoologica Bulgarica                                                                                                                                                                                                                                                       | 62                                                     | 3       | 307-316 | Romania     | 44.775114    | 28.890118    | no         | Hyla           | Bufonidae       | Bufo viridis               | generalist         | 34         | 74.3  | no | 9   | 0        |   |
| 2009 Individual-level diet v Journal of Animal Ecol                                                                                                                                                                                                                                                       | 78                                                     | 4       | 848-856 | Brazil      | -18.92       | -48.285      | no         | Ranoidea       | Microhylidae    | Chiasmocleis albopunctata  | generalist         | 51         | 27.7  | no | 50  | 0        |   |
| 1983 Trophic relationships c Herpetologica                                                                                                                                                                                                                                                                | 39                                                     | 2       | 130-140 | Australia   | -37.28277    | 144.966431   | no         | Hyla           | Myobatrachidae  | Crinia parinsignifera      | generalist         | 77         | 22    | no | 13  | 0        |   |
| 1971 The food of some Aust Journal of Zoology                                                                                                                                                                                                                                                             |                                                        |         |         | Australia   | -35.289      | 145.503      | no         | Hyla           | Myobatrachidae  | Crinia signifera           | generalist         | 46         | 23    | no | 11  | 0        |   |
| 1983 Trophic relationships c Herpetologica                                                                                                                                                                                                                                                                | 39                                                     | 2       | 130-140 | Australia   | -37.28277    | 144.966431   | no         | Hyla           | Myobatrachidae  | Crinia signifera           | generalist         | 148        | 30    | no | 13  | 0        |   |
| 2007 Microhabitat use, diet Caldasia                                                                                                                                                                                                                                                                      | 29                                                     | 2       | 413-425 | Colombia    | 9            | -73.966667   | no         | Hyla           | Hylidae         | microcephalus              | generalist         | 54         | 26    | no | 22  | 0        |   |
| 1999 Feeding habits of sym Herpetological Journal                                                                                                                                                                                                                                                         | 9                                                      | 4       | 163-167 | Corsica     | 41.680507    | 9.211553     | no         | Discoglossidae | Alytidae        | Discoglossus sardus        | generalist         | 49         | 48.4  | no | 5   | 0        |   |
| 1962 The food of the comm Copeia                                                                                                                                                                                                                                                                          | ###                                                    | 4       | 736-741 | Singapore   | 1.317649     | 103.816168   | no         | Hyla           | Bufonidae       | Duttaphrynus melanostictus | generalist         | 109        | 79.1  | no | 25  | 0        |   |
| 1962 The food of the comm Copeia                                                                                                                                                                                                                                                                          | ###                                                    | 4       | 736-742 | Singapore   | 3.13875      | 101.791203   | no         | Hyla           | Bufonidae       | Duttaphrynus melanostictus | generalist         | 30         | 79.1  | no | 41  | 0        |   |
| 2014 Notes on the diets of five amphibian species fr                                                                                                                                                                                                                                                      | 30                                                     | 69-77   |         | Taiwan      | 23.43283333  | 120.485      | no         | Hyla           | Bufonidae       | Duttaphrynus melanostictus | generalist         | 77         | 26.4  | no | 15  | 0        |   |
| 2011 Ecologia alimentar de Thesis - Universidade de Brasilia                                                                                                                                                                                                                                              |                                                        |         |         | Brazil      | -15.571951   | -47.52666    | no         | Ranoidea       | Microhylidae    | Elachistocleis cesarii     | generalist         | 171        | 28.6  | no | 54  | 0        |   |
| 1987 Dietary Patterns of the Herpetologica                                                                                                                                                                                                                                                                | 43                                                     | 1       | to 6    | Indonesia   | -6.608324    | -66.790519   | no         | Ranoidea       | Dicroglossidae  | Fejervarya cancrivora      | generalist         | 326        | 79    | no | 19  | 0.035639 |   |
| 2007 A comparison of stom: Acta Zoologica Sinica                                                                                                                                                                                                                                                          | 53                                                     | 2       | 364-372 | China       | 29.843852    | 122.032164   | no         | Ranoidea       | Dicroglossidae  | Fejervarya limnocharis     | generalist         | 174        | 41.04 | no | 13  | 0        |   |
| 2012 Trophic ecology and Zoologia (Curitiba)                                                                                                                                                                                                                                                              | 29                                                     | 1       | 54-60   | China       | 30.583333    | 105.75       | no         | Ranoidea       | Dicroglossidae  | Fejervarya limnocharis     | generalist         | 35         | 36.2  | no | 10  | 0        |   |
| 2013 Ant species in the diet Southeastern Naturalist                                                                                                                                                                                                                                                      | 12                                                     | 2       | 367-378 | USA         | 27.186744    | -81.34741    | no         | Ranoidea       | Microhylidae    | Gastrophryne carolinensis  | generalist         | 146        | 25    | no | 16  | 0        |   |
| 2000 Myrmecophagy in a ra Zoological Science                                                                                                                                                                                                                                                              | 17                                                     | 4       | 459-466 | Japan       | 35.10054     | 135.86627    | no         | Ranoidea       | Ranidae         | Glandirana rugosa          | generalist         | 72         | 38    | no | 12  | 0        |   |
| 2012 Diets of Hemisus mam Zoologist                                                                                                                                                                                                                                                                       | 10                                                     | 48-52   |         | Nigeria     | 6.111486     | 5.300583     | no         | Ranoidea       | Hemisotidae     | Hemisus marmoratus         | generalist         | 22         | 29.9  | no | 31  | 0        |   |
| 2010 Living together, somet Brazilian Journal of Biol                                                                                                                                                                                                                                                     | 70                                                     | 4       | 955-960 | Brazil      | -19.56666    | -57          | no         | Hyla           | Hylidae         | Hypsiboas raniceps         | generalist         | 37         | 44.8  | no | 43  | 0        |   |
| 2000 Feeding in anuran corr Amphibia-Reptilia                                                                                                                                                                                                                                                             | 22                                                     |         |         | Romania     | 45.166667    | 27.933333    | no         | Hyla           | Hylidae         | Hyla arborea               | generalist         | 34         | 45    | no | 9   | 0        |   |
| 2014 Reproduction and diet Vertebrate Zoology                                                                                                                                                                                                                                                             | 64                                                     | 2       | 207-213 | Mexico      | 18.283333    | -97.066667   | no         | Hyla           | Hylidae         | Hyla euphorbiaceae         | generalist         | 36         | 36.05 | no | 9   | 0        |   |
| 2007 Diet composition of H Japanese Journal of App                                                                                                                                                                                                                                                        | 51                                                     | 2       | 103-106 | Japan       | 38.569643    | 140.972329   | no         | Hyla           | Hylidae         | Hyla japonica              | generalist         | 101        | 33    | no | 10  | 0        |   |
| 2007 Diet of the Gray Treefr Journal of Herpetology                                                                                                                                                                                                                                                       | 41                                                     | 1       | 16-23   | Missouri, L | 38.771909    | -92.197695   | no         | Hyla           | Hylidae         | Hyla versicolor            | generalist         | 107        | 41.5  | no | 16  | 0        |   |
| 2012 Trophic ecology and Zoologia (Curitiba)                                                                                                                                                                                                                                                              | 29                                                     | 1       | 54-59   | China       | 30.583333    | 105.75       | no         | Ranoidea       | Ranidae         | Hylarana guentheri         | generalist         | 25         | 56.3  | no | 10  | 0        |   |
| 2001 Ecologia trfica de la c Mongraphie, Pontificia Universidad Catolica del                                                                                                                                                                                                                              |                                                        |         |         | Ecuador     | -1.099699    | -75.80815    | no         | Hyla           | Hylidae         | Hypsiboas geographicus     | generalist         | 27         | 52.21 | no | 104 | 0        |   |
| 2011 Trophic niche variatio South American Journal                                                                                                                                                                                                                                                        | 6                                                      | 2       | 98-106  | Uruguay     | -34.783333   | -55.36666    | no         | Hyla           | Hylidae         | Hypsiboas pulchellus       | generalist         | 169        | 105   | no | 19  | 0        |   |
| 2004 Temporal and spatial c Phyllomedusa: Journal                                                                                                                                                                                                                                                         | 3                                                      | 2       | 101-103 | Uruguay     | -34.783333   | -55.366667   | no         | Hyla           | Hylidae         | Hypsiboas pulchellus       | generalist         | 105        | 50    | no | 19  | 0        |   |
| 2007 Intrapopulation diet v: Copeia                                                                                                                                                                                                                                                                       | ###                                                    | 855-865 |         | Brazil      | -18.916763   | -48.283816   | no         | Hyla           | Leptodactylidae | Leptodactylus cf. andreae  | generalist         | 100        | 21    | no | 50  | 0        |   |
| 2012 Diet of Leptodactylus f Biota Neotropica                                                                                                                                                                                                                                                             | 12                                                     | 1       | 99-104  | Brazil      | -19.576944   | -57.011667   | no         | Hyla           | Leptodactylidae | Leptodactylus fuscus       | generalist         | 33         | 41.48 | no | 43  | 0        |   |
| 2012 Diet of Leptodactylus f Biota Neotropica                                                                                                                                                                                                                                                             | 12                                                     | 1       | 99-104  | Brazil      | -19.576944   | -57.011667   | no         | Hyla           | Leptodactylidae | Leptodactylus fuscus       | generalist         | 44         | 41.48 | no | 43  | 0        |   |
| 2007 Intrapopulation diet v: Copeia                                                                                                                                                                                                                                                                       | ###                                                    | 855-865 |         | Brazil      | -18.916763   | -48.283816   | no         | Hyla           | Leptodactylidae | Leptodactylus fuscus       | generalist         | 83         | 35    | no | 50  | 0.002252 |   |
| 2005 Dieta de Leptodactylu: Revista Peruana de Biol                                                                                                                                                                                                                                                       | 12                                                     | 3       | 473-477 | Argentina   | -31.1966666  | -69.1666666  | no         | Hyla           | Leptodactylidae | Leptodactylus latrans      | generalist         | 35         | 43.69 | no | 1   | 0.051282 |   |
| 1984 Diet and foraging mod Journal of Herpetology                                                                                                                                                                                                                                                         | 18                                                     | 2       | 138-146 | Brazil      | -2.476180556 | -54.95842222 | no         | Hyla           | Leptodactylidae | Leptodactylus latrans      | generalist         | 21         | 70    | no | 79  | 0        |   |
| 2003 Diet of Leptodactylus c Cuadernos de Herpetol                                                                                                                                                                                                                                                        | 17                                                     | 1       | 111-118 | Brazil      | -20.766667   | -40.583333   | no         | Hyla           | Leptodactylidae | Leptodactylus latrans      | generalist         | 57         | 70    | no | 74  | 0.027778 |   |
| 2011 Ecologia alimentar de Thesis - Universidade de Brasilia                                                                                                                                                                                                                                              |                                                        |         |         | Brazil      | -15.571951   | -47.52666    | no         | Hyla           | Leptodactylidae | Leptodactylus latrans      | generalist         | 21         | 110   | no | 54  | 0        |   |
| 1996 Dinamica trophica de j Cuadernos de Herpetol                                                                                                                                                                                                                                                         | 10                                                     |         |         | Argentina   | -31.68333    | -60.7        | no         | Hyla           | Leptodactylidae | Leptodactylus macrosternum | generalist         | 31         | 80    | no | 30  | 0        |   |





|                              |      |                          |                                   |                          |              |             |              |              |     |          |                     |                   |                  |            |     |       |          |    |          |
|------------------------------|------|--------------------------|-----------------------------------|--------------------------|--------------|-------------|--------------|--------------|-----|----------|---------------------|-------------------|------------------|------------|-----|-------|----------|----|----------|
| Amanda Saldanha Barbo        | 2014 | Diet of Hypsiboas lept   | Herpetology Notes                 | 7                        | 505-508      | Brazil      | -29.1612     | -50.09       | no  | Hyloidea | Hylidae             | Hypsiboas         | leptolineatus    | grassland  | 41  | 33    | no       | 55 | 0        |
| Duré MI, Kehr AI             | 2004 | Influence of microhabi   | Herpetologica                     | 60                       | 295-303      | Argentina   | -27.499995   | -58.749989   | no  | Hyloidea | Leptodactylidae     | Leptodactylus     | bufonius         | grassland  | 20  | 44    | no       | 42 | 0        |
| Piatti, L., & F. L. Souza    | 2011 | . Diet and resource pa   | Brazilian Journal of Biolo        | 71                       | 3 653-662    | Brazil      | -20.0861111  | -56.6158333  | no  | Hyloidea | Leptodactylidae     | Leptodactylus     | elenae           | grassland  | 27  | 43    | no       | 43 | 0        |
| Duré MI, Kehr AI             | 2004 | Influence of microhabi   | Herpetologica                     | 60                       | 295-303      | Argentina   | -27.499995   | -58.749989   | no  | Hyloidea | Leptodactylidae     | Leptodactylus     | latinus          | grassland  | 70  | 28    | no       | 42 | 0        |
| Piatti, L., & F. L. Souza    | 2011 | . Diet and resource pa   | Brazilian Journal of Biolo        | 71                       | 3 653-663    | Brazil      | -20.0861111  | -56.6158333  | no  | Hyloidea | Leptodactylidae     | Leptodactylus     | podicipinus      | grassland  | 40  | 48    | no       | 43 | 0        |
| Crawford, J. A., D. B. She   | 2009 | Diet Composition and     | Copeia                            | 4                        | 642-646      | USA         | 35.75        | -95.15       | no  | Ranoidea | Ranidae             | Lithobates        | areolatus        | grassland  | 53  | 31.01 | no       | 17 | 0        |
| Duré, M. I., A. I. Kehr, an  | 2009 | Niche overlap and res    | Phyllomedusa                      | 8                        | 1 27-42      | Argentina   | -27.5        | -58.75       | no  | Hyloidea | Bufonidae           | Melanophryniscus  | cupreuscapularis | grassland  | 22  | 25    | no       | 44 | 0        |
| Isacch, J. P. & M., Barg     | 2002 | Are bufonid toads spe    | Journal of Natural Histor         | 36                       | 16 2005-2013 | Argentina   | -37.45       | -57.183333   | no  | Hyloidea | Odontophrynidae     | Odontophrynus     | americanus       | grassland  | 67  | 22.5  | no       | 8  | 0        |
| Wu, Z., Y. Li and Y. Wang    | 2007 | A comparison of stom:    | Acta Zoologica Sinica             | 53                       | 2 364-372    | China       | 29.843852    | 122.032164   | no  | Ranoidea | Ranidae             | Pelophylax        | plancyi          | grassland  | 128 | 46.97 | no       | 13 | 0        |
| Alejandro Falico, D., J. Al  | 2012 | Interpopulation and o    | Revista Mexicana De Bic           | 83                       | 4 1187-1193  | Argentina   | -30.36323889 | -60.67286667 | no  | Hyloidea | Leptodactylidae     | Physalaemus       | albonotatus      | grassland  | 35  | 30.2  | no       | 42 | 0        |
| Attademo, A. M., W. Cej      | 2007 | Feeding habits of Phys   | Russian Journal of Herpet         | 14                       | 1 1ÿ-6       | Argentina   | -31.2461     | -63.552      | no  | Hyloidea | Leptodactylidae     | Physalaemus       | biligonigerus    | grassland  | 27  | 35.33 | no       | 8  | 0        |
| R"dder, D.                   | 2011 | Diet of Physalaemus b    | Russian Journal of Herpet         | 15                       | 2 117-121    | Paraguay    | -21.673963   | -60.814138   | no  | Hyloidea | Leptodactylidae     | Physalaemus       | biligonigerus    | grassland  | 57  | 35.6  | no       | 30 | 0        |
| Pinto, P. M.                 | 2011 | Ecologia alimentar de    | Thesis - Universidade de Brasilia |                          |              | Brazil      | -15.571951   | -47.52666    | no  | Hyloidea | Leptodactylidae     | Physalaemus       | centralis        | grassland  | 298 | 31    | no       | 54 | 0        |
| Santana, A. S. and F. A. J   | 2007 | Diet of Physalaemus c    | Brazilian journal of biolo        | 67                       | 1 125-131    | Brazil      | -12.563      | -41.433      | no  | Hyloidea | Leptodactylidae     | Physalaemus       | cidada           | grassland  | 100 | 24.75 | no       | 39 | 0        |
| Pinto, P. M.                 | 2011 | Ecologia alimentar de    | Thesis - Universidade de Brasilia |                          |              | Brazil      | -15.571951   | -47.52666    | no  | Hyloidea | Leptodactylidae     | Physalaemus       | cuvieri          | grassland  | 112 | 30.6  | no       | 54 | 0        |
| Araujo, M. S., D. I. Bolnic  | 2009 | Individual-level diet v  | Journal of Animal Ecolog          | 78                       | 4 848-856    | Brazil      | -18.92       | -48.285      | no  | Hyloidea | Leptodactylidae     | Physalaemus       | nattereri        | grassland  | 65  | 47.5  | no       | 50 | 0        |
| Canedo, C. L. A. R. I. S. S. | 2006 | Diet of Pipa carvalhoi   | (Herpetological Review            | 37                       | 1 44-45      | Brazil      | -14.791923   | -39.032869   | no  | Pipoidea | Pipidae             | Pipa              | carvalhoi        | grassland  | 54  | 60    | no       | 57 | 0        |
| Christian KA                 | 1982 | Changes in the food ni   | Copeia                            | ###                      | 73-80        | USA         | 40.504061    | -104.968896  | no  | Hyloidea | Hylidae             | Pseudacris        | maculata         | grassland  | 393 | 22    | no       | 8  | 0        |
| Miranda, T., M. Ebner, Iv    | 2006 | Spatial, seasonal and i  | South American Journal            | 1                        | 2 121-130    | Brazil      | -29.583333   | -50.133333   | no  | Hyloidea | Hylidae             | Pseudis           | cardosoi         | grassland  | 130 | 44.5  | no       | 38 | 0.001339 |
| Duré MI, Kehr AI             | 2001 | Differential exploitatic | Argent J Herpetol                 | 35                       | 340-343      | Argentina   | -27.499995   | -58.749989   | no  | Hyloidea | Hylidae             | Pseudis           | laevis           | grassland  | 75  | 16.9  | no       | 42 | 0        |
| Conradie, W., W. R. Bran     | 2010 | Notes on the diet of re  | Herpetology Notes                 | 3                        | 215-219      | South Afric | -32.556944   | 22.572222    | no  | Ranoidea | Pyxicephalidae      | Pyxicephalus      | adspersus        | grassland  | 89  | 39.3  | no       | 9  | 0.087324 |
| Piatti, L., & F. L. Souza    | 2011 | . Diet and resource pa   | Brazilian Journal of Biolo        | 71                       | 3 653-664    | Brazil      | -20.0861111  | -56.6158333  | no  | Hyloidea | Bufonidae           | Rhinella          | bergi            | grassland  | 50  | 42    | no       | 43 | 0        |
| Isacch, J. P. & M., Barg     | 2002 | Are bufonid toads spe    | Journal of Natural Histor         | 36                       | 16 2005-2012 | Argentina   | -37.45       | -57.183333   | no  | Hyloidea | Bufonidae           | Rhinella          | dorbignyi        | grassland  | 40  | 20.2  | no       | 8  | 0        |
| Duré, M. I., A. I. Kehr, an  | 2009 | Niche overlap and res    | Phyllomedusa                      | 8                        | 1 27-41      | Argentina   | -27.5        | -58.75       | no  | Hyloidea | Bufonidae           | Rhinella          | fernandezae      | grassland  | 21  | 75    | no       | 44 | 0        |
| Measey, G. J. and Royer      | 2005 | An examination of Pip:   | The Herpetological Jour           | 15                       | 4 291-294    | Venezuela   | 10.1         | -68.133333   | yes | Pipoidea | Pipidae             | Pipa              | parva            | grassland  | 42  | 37.34 | no       | 18 | 0        |
| Piatti, L., & F. L. Souza    | 2011 | . Diet and resource pa   | Brazilian Journal of Biolo        | 71                       | 3 653-661    | Brazil      | -20.0861111  | -56.6158333  | no  | Hyloidea | Leptodactylidae     | Leptodactylus     | chaquensis       | grassland  | 121 | 65    | possible | 43 | 0.003774 |
| Hirai, T. yãnd Matsui        | 2001 | Food habits of an end:   | Ecological Research               | 16                       | 4 737-743    | Japan       | 35.1333333   | 135.983333   | no  | Ranoidea | Ranidae             | Physalaemus       | porosus          | grassland  | 58  | 52    | possible | 12 | 0.002387 |
| Smith, C. C., & A. N. Brag   | 1949 | Observations on the e    | Ecology                           | 30                       | 3 333-352    | USA         | 35.164006    | -97.207129   | no  | Hyloidea | Bufonidae           | Anaxyrus          | compactilis      | shrubland  | 94  | 90    | no       | 15 | 0        |
| Brito, L., F. Aguiar and P.  | 2012 | Diet composition and     | South American Journal            | 7                        | 1 55-61      | Brazil      | -4.267553    | -38.936311   | no  | Hyloidea | Odontophrynidae     | Odontophrynus     | carvalhoi        | shrubland  | 21  | 54.7  | no       | 30 | 0        |
| Pengilley R. K.              | 1971 | The food of some Aust    | Journal of Zoology                |                          |              | Australia   | -35.289      | 145.503      | no  | Hyloidea | Myobatrachidae      | Pseudophryne      | corroboree       | shrubland  | 275 | 30    | no       | 11 | 0        |
| Duré MI                      | 1999 | Interrelaciones en los   | Cuad Herpetol                     | 13                       | 11/18/2015   | Argentina   | -27.499995   | -58.749989   | no  | Hyloidea | Hylidae             | Scinax            | acuminatus       | shrubland  | 42  | 34.8  | no       | 42 | 0        |
| Sabagh, L. T., V. L. Ferrei  | 2010 | Living together, somet   | Brazilian Journal of Biolo        | 70                       | 4 955-959    | Brazil      | -19.56666    | -57          | no  | Hyloidea | Hylidae             | Scinax            | acuminatus       | shrubland  | 31  | 40.7  | no       | 43 | 0        |
| COURANT, J., THIRION, J      | 2014 | Le régime alimentaire    | Bulletin de la Société he         | 150                      |              | France      | 47.036426    | -0.308333    | yes | Pipoidea | Pipidae             | Xenopus           | laevis           | generalist | 23  | 110   | no       | 10 | 0        |
| Tolojanahary, N. L., Fatr    | 2011 | Diet of the Mascarene    | Malagasy Nature,                  | 5                        | 68-74.       | Madagasc    | -21.261692   | 47.459434    | no  | Ranoidea | Ptychadenidae       | Ptychadena        | mascareniensis   | generalist | 190 | 43    | possible | 69 | 0.002347 |
| de Oliveira, E. G., & Hadc   | 2015 | Diet Seasonality and F   | Journal of Herpetology            | 49                       | 2 252-256    | Brazil      | -23.35265556 | -45.13283611 | no  | Hyloidea | Brachycephalidae    | Brachycephalus    | pitanga          | forest     | 30  | 11.75 | no       | 89 | 0        |
| Pizzatto, L., & R. Shine     | 2008 | The behavioral ecolog    | Behavioral Ecology and            | 63                       | 1 123-133    | Australia   | -12.66       | 131.336      | yes | Hyloidea | Bufonidae           | Rhinella          | marina           | generalist | 131 | 146   | yes      | 23 | 0.155056 |
| Allingham, S. M. & M., H     | 2011 | Feeding Ecology of Ka:   | Current Herpetology               | 30                       | 2 137-143    | Cameroon    | 8.333333333  | 13.83333333  | no  | Ranoidea | Hyperolidae         | Kassina           | senegalensis     | generalist | 55  | 33    | no       | 24 | 0        |
| Ferreira, R. B., K. H., Bea  | 2015 | Diet of the Nonnative    | Journal of Herpetology            | 49                       | 2            | Hawaii      | 20.740838    | -156.441316  | yes | Hyloidea | Eleutherodactylidae | Eleutherodactylus | planirostris     | forest     | 397 | 21.1  | no       | 5  | 0        |
| Neves, M. D. O., C. J. D. f  | 2014 | Sexual Dimorphism an     | South American Journal            | 9                        | 3 177-182    | Brazil      | -9.622019    | -48.27751    | no  | Hyloidea | Hylidae             | Pseudis           | tocantins        | generalist | 159 | 45    | possible | 43 | 0.004444 |
| Teixeira, R. L., & R. B. Fei | 2010 | Diet and fecundity of    | Revista española de her           | 24                       | 19-25        | Brazil      | -20.800753   | -40.65657    | no  | Hyloidea | Hylidae             | Sphaenorhynchus   | planicola        | generalist | 88  | 22.5  | no       | 73 | 0        |
| de Oliveira, M., Gottsche    | 2015 | Diet composition and     | Herpetology Notes,                | 8                        | 173-177      | Brazil      | -32.115284   | -52.210201   | no  | Hyloidea | Leptodactylidae     | Physalaemus       | gracilis         | generalist | 44  | 43    | no       | 23 | 0        |
| de Oliveira, M., Gottsche    | 2015 | Diet composition and     | Herpetology Notes,                | 8                        | 173-177      | Brazil      | -32.115284   | -52.210201   | no  | Hyloidea | Leptodactylidae     | Physalaemus       | biligonigerus    | generalist | 49  | 40    | no       | 23 | 0        |
| Raoni Rebouças & Mirco       | 2015 | Diet of Adenomera th     | Studies on Neotropical F          | http://dx.doi.org/10.101 |              | Brazil      | -13.833359   | -39.166867   | no  | Hyloidea | Leptodactylidae     | Adenomera         | thomei           | forest     | 91  | 20.13 | no       | 56 | 0        |
| Luiz, Contrera & Neckel-     | 2015 | Diet and tadpole trans   | Herpetological Journal            |                          |              | Brazil      | -2.161533    | -56.084417   | no  | Hyloidea | Dendrobatidae       | Ameerega          | trivittata       | forest     | 56  | 38    | no       | 76 | 0        |
| Agudelo, G. A., R. S. Cast   | 2014 | Diet of the Blue-Bellie  | Journal of Herpetology            | 49                       | 2            | Colombia    | 3.977107     | -77.336378   | no  | Hyloidea | Dendrobatidae       | Andinobates       | minutus          | forest     | 150 | 11.8  | no       | 40 | 0        |
| Isaacs, P., & J. M., Hoyos   | 2010 | Diet of the Cane Toad    | South American Journal            | 5                        | 1 45-50      | Colombia    | 4.602777778  | -75.83333333 | no  | Hyloidea | Bufonidae           | Rhinella          | marina           | generalist | 49  | 146   | no       | 5  | 0        |
| Macale D, Vignoli L, Carp    | 2008 | Food selection strateg   | Herpetological Journal,           | 18                       | 49-58        | Argentina   | -28.475558   | -57.200598   | no  | Hyloidea | Hylidae             | Dendropsophus     | nanum            | generalist | 47  | 20    | no       | 32 | 0        |
| Macale D, Vignoli L, Carp    | 2008 | Food selection strateg   | Herpetological Journal,           | 18                       | 49-58        | Argentina   | -28.475558   | -57.200598   | no  | Hyloidea | Hylidae             | Dendropsophus     | sanborni         | grassland  | 76  | 16.6  | no       | 32 | 0        |
| Vignoli L, Luiselli L, Bolog | 2009 | Dietary patterns and     | Vie Milieu Life Environ           | 59                       | 47-57        | Italy       | 42.139649    | 12.109967    | no  | Ranoidea | Ranidae             | Pelophylax        | esculentus       | generalist | 104 | 88.8  | no       | 8  | 0.006579 |
| Vignoli L, Luiselli L, Bolog | 2009 | Dietary patterns and     | Vie Milieu Life Environ           | 59                       | 47-57        | Italy       | 42.139649    | 12.109967    | no  | Hyloidea | Hylidae             | Hyla              | intermedia       | generalist | 62  | 45    | no       | 8  | 0        |
